# Supplementary material for: Clinical application of exome sequencing in undiagnosed genetic conditions
Source: PubMed Central journal article supplement — J Med Genet. 2012 May 11;49(6):353–61. doi: 10.1136/jmedgenet-2012-100819 (PMC3375064; doi:10.1136/jmedgenet-2012-100819), 2012-05-11
Supplement: jmedgenet-2012-100819-s1.pdf [file jmedgenet-2012-100819-s1.pdf]

# Sequence whole exome of patient and parents

-Agilent 50mb kit

-Average coverage between 60-70x

->80-85% of captured region covered with sufficient reads to accurately call variants

## Identify variants by comparison to reference genome

Aligned using the Burrows-Wheeler Alignment (BWA) tool, SNVs and indels identified by using SAMtools

Identify *de novo* variants

Identify recessive and X-linked variants

Identify compound heterozygote genes

Investigate all candidate genes based on any known associated human disease or mouse knockout phenotype

**Functional follow-up of good candidate variants**
